# Supplementary material
Source: MDPI journal article supplement (https://www.mdpi.com/2073-4344/12/10/1290)
Supplement: s1 [file s1]

Supplementary Materials

# Photocatalytic Degradation of Eriochrome Black-T Using BaWO<sub>4</sub>/MoS<sub>2</sub> Composite

Yuvaraj M. Hunge <sup>1,†,\*</sup>, Anuja A. Yadav <sup>2,†</sup> and Seok-Won Kang <sup>2</sup>

<sup>1</sup> Division of Biotechnology, Daegu Gyeongbuk Institute of Science and Technology (DGIST), Daegu 42988, Korea

<sup>2</sup> Department of Automotive Engineering, Yeungnam University, 280 Daehak-ro, Gyeongsan, 38541, Korea; anujayadav5@gmail.com (A.A.Y.); swkang@yu.ac.kr (S.-W.K.)

\* Correspondence: yuvarajhunge@gmail.com

† These authors equally contributed to this work.

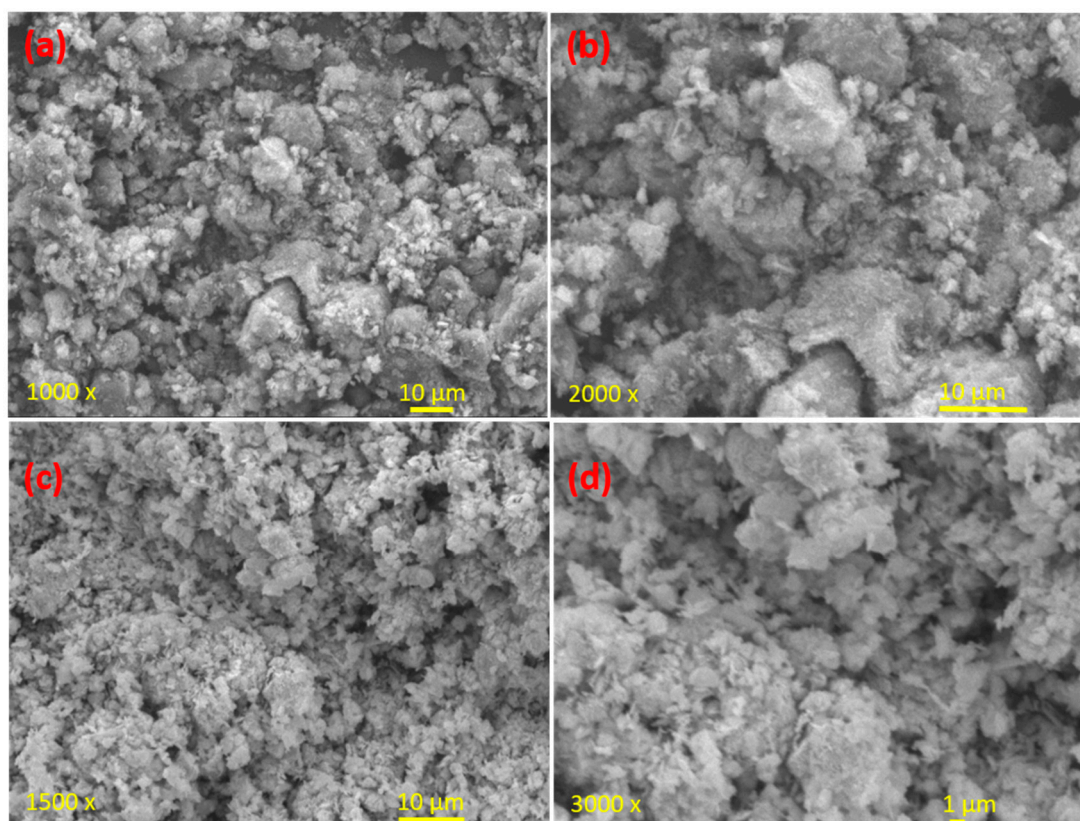

**Figure S1.** SEM images of BaWO<sub>4</sub>/MoS<sub>2</sub> composite at different magnifications.

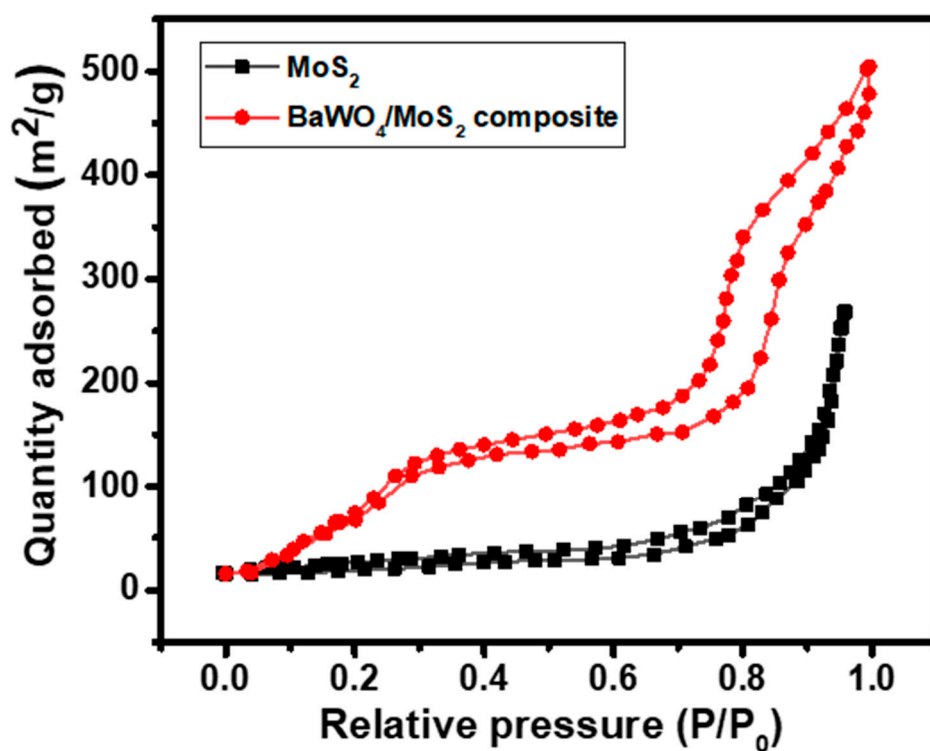

Figure S2. BET surface area of BaWO<sub>4</sub>/MoS<sub>2</sub> composite.

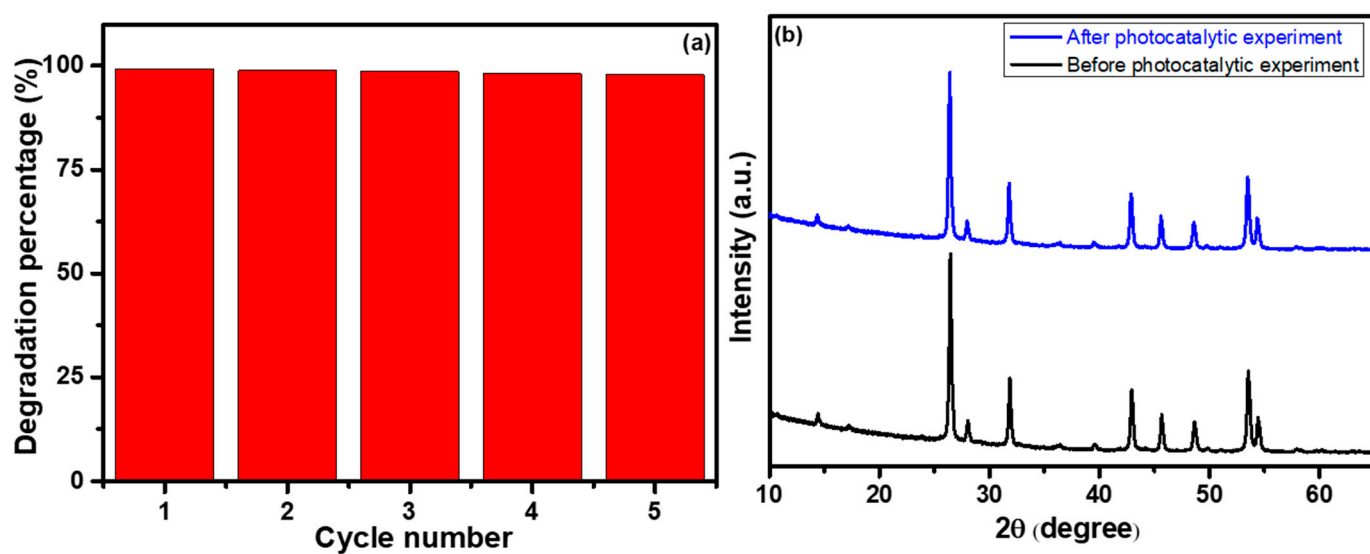

Figure S3. Stability study of BaWO<sub>4</sub>/MoS<sub>2</sub> composite (a) Recycle test, and (b) XRD patterns of BaWO<sub>4</sub>/MoS<sub>2</sub> composite before and after the fifth cycle of the photocatalytic experiment.

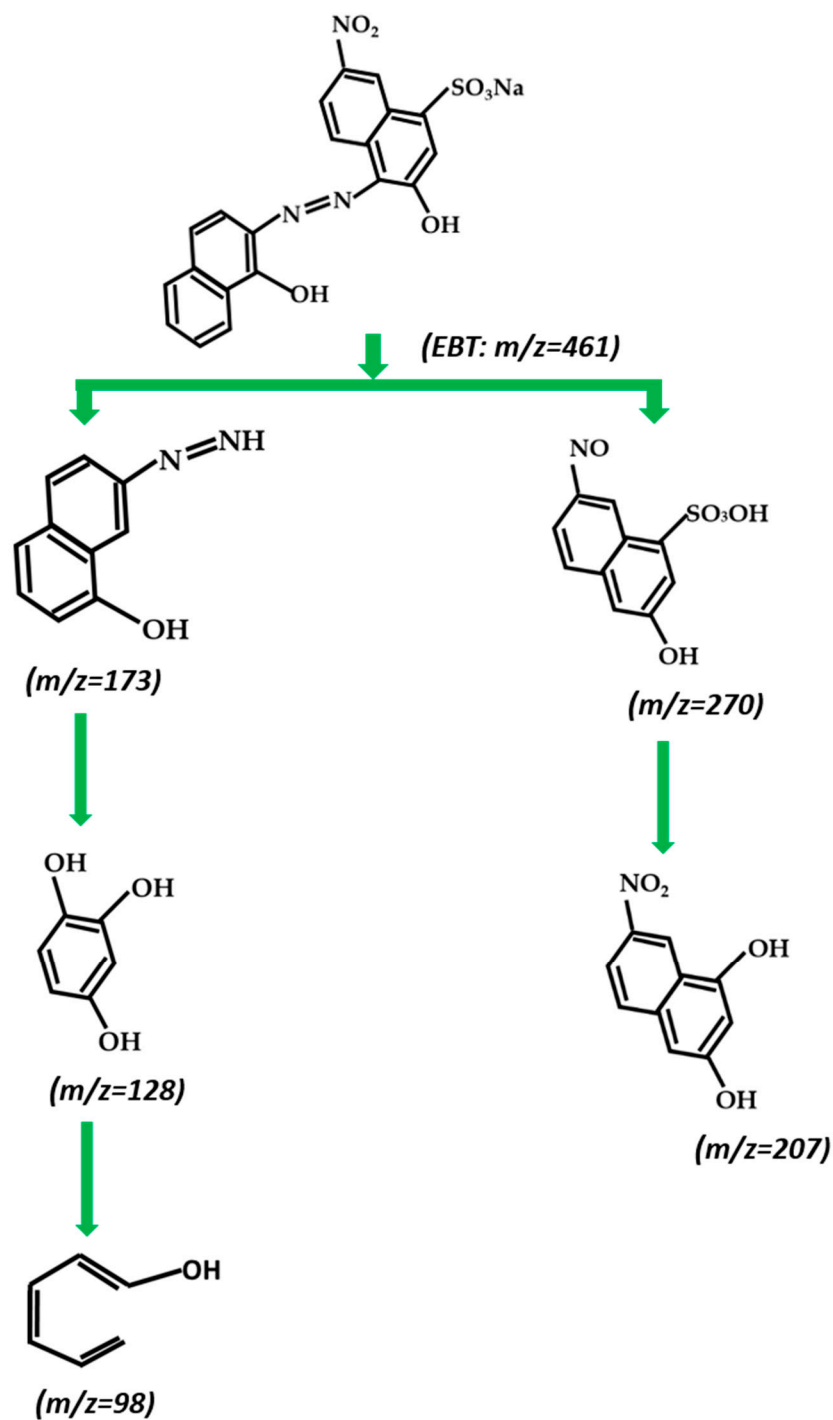

**Figure S4.** Possible pathways for photocatalytic degradation of EBT using BaWO<sub>4</sub>/MoS<sub>2</sub> composite.
